# Supplementary material for: Chronic Variable Stress Induces Hepatic Fe(II) Deposition by Up-Regulating ZIP14 Expression via miR-181 Family Pathway in Rats
Source: MDPI journal article supplement (doi:10.3390/biology10070653), 2021-07-12
Supplement: s1 [file s1]

## Supplementary materials

Supplementary materials contain Supplementary Tables 1-8.

**Table S1.** Stressor agents used during the chronic variable stress.

| Day of treatment | Stressor           | Duration | Start time |
|------------------|--------------------|----------|------------|
| 1                | restrain stress    | 3 h      | 9:00 am    |
| 2                | cold stress        | 1 h      | 10:00 am   |
| 3                | rotation stress    | 1 h      | 9:00 am    |
| 4                | warm swim          | 20 min   | 10:30 am   |
| 5                | cold swim          | 10 min   | 11:am      |
| 6                | Water depriva-tion | 24 h     | 10:00 am   |
| 7                | rotation stress    | 1 h      | 9:00 am    |
| 8                | restrain stress    | 3 h      | 9:00 am    |
| 9                | cold swim          | 10 min   | 11:am      |
| 10               | warm swim          | 20 min   | 10:30 am   |
| 11               | Water depriva-tion | 24 h     | 10:00 am   |
| 12               | cold stress        | 1 h      | 10:00 am   |
| 13               | cold swim          | 10 min   | 11:am      |
| 14               | warm swim          | 20 min   | 10:30 am   |
| 15               | rotation stress    | 1 h      | 9:00 am    |
| 16               | Water depriva-tion | 24 h     | 10:00 am   |
| 17               | cold stress        | 1 h      | 10:00 am   |
| 18               | restrain stress    | 3 h      | 9:00 am    |
| 19               | rotation stress    | 1 h      | 9:00 am    |
| 20               | warm swim          | 20 min   | 10:30 am   |
| 21               | restrain stress    | 3 h      | 9:00 am    |

Table S2. Nucleotide sequences of specific primers for target genes.

| Target genes    | Sequences (5' to 3')       |                          | Products | Accession No.  |
|-----------------|----------------------------|--------------------------|----------|----------------|
| <i>Tfr1</i>     | F: tttagtgattgtagagcagggaa | R: atggcggaaactgagtatgg  | 212 bp   | NM_022712.1    |
| <i>Tfr2</i>     | F: tccctccagtagaatcatcgg   | R: tgttgaccacaaggcgtaa   | 180 bp   | NM_001105916.1 |
| <i>Dmt1</i>     | F: ttgctgtctccgtctttgct    | R: ccagggtagagttgtcgtagg | 120 bp   | NM_013173.2    |
| <i>Zip14</i>    | F: atcccagagtgttgctac      | R: ctaatgccttggaagacaga  | 153 bp   | NM_001107275.1 |
| <i>Ftl</i>      | F: tccaggatgtgcagaagcc     | R: ccctacggaggttggtcag   | 228 bp   | NM_022500.4    |
| <i>Fth</i>      | F: ggaactcacaaactggctac    | R: tggatttcacctgctcatt   | 89 bp    | NM_012848.2    |
| <i>Fpn</i>      | F: agtcattggctgtggttc      | R: tcaagttcacggatgtaga   | 228 bp   | NM_133315.2    |
| <i>Hepcidin</i> | F: ctgcctgtctcctgctctc     | R: agtgggtgtctcgcttcctt  | 162 bp   | NM_053469.1    |
| <i>Ppia</i>     | F: ttgggaaggtgaaagaaggc    | R: gttgtccacagtcggagatg  | 105 bp   | NM_017101.1    |

Note: Tfr1, transferrin receptor 1; Tfr2, transferrin receptor 2; Dmt1, divalent metal transporter 1; Zip14, ZRT/IRT-like protein 14; Ftl, ferritin light chain; Fth, ferritin heavy chain; Fpn, ferroportin; Ppia, peptidylprolyl isomerase A.

Table S3. Details of antibodies used in the experiment.

| Antibodies                      | MW    | Species | Source               | Catalogue no. | Dilution ratio |
|---------------------------------|-------|---------|----------------------|---------------|----------------|
| Primary antibody                |       |         |                      |               |                |
| TFR1                            | 90 kd | Mouse   | Life Technologies    | 136800        | 1:1000         |
| TFR2                            | 98 kd | Rabbit  | Sigma                | SAB2700078    | 1:1000         |
| DMT1                            | 72 kd | Rabbit  | Proteintech          | 20507-1-AP    | 1:1000         |
| ZIP14                           | 54 kd | Rabbit  | Abcam                | ab123988      | 1:500          |
| FTL                             | 19 kd | Rabbit  | Bioworld             | BS7403        | 1:1000         |
| FTH                             | 21 kd | Rabbit  | Affinity Biosciences | DF6278        | 1:1000         |
| FPN                             | 53 kd | Goat    | Santa Cruz           | sc-49668      | 1:500          |
| Hepcidin                        | 32 kd | Rabbit  | Abcam                | ab75883       | 1:500          |
| $\beta$ -actin                  | 43 kd | Mouse   | Bioworld             | BS6007M       | 1:10000        |
| Second antibody                 |       |         |                      |               |                |
| Goat anti-Mouse IgG (H+L) - HRP |       | Goat    | Bioworld             | BS12478       | 1:10000        |
| Goat anti-Rabbit IgG (H+L)- HRP |       | Goat    | Bioworld             | BS13278       | 1:10000        |
| Rabbit Anti-Goat IgG (H+L)- HRP |       | Rabbit  | Bioworld             | BS30503       | 1:10000        |

Note: TFR1, transferrin receptor 1; TFR2, transferrin receptor 2; DMT1, divalent metal transporter 1; ZIP14, ZRT/IRT-like protein 14; FTL, ferritin light chain; FTH, ferritin heavy chain; FPN, ferroportin.

Table S4. miRNAs targeted ZIP14 prediction using TargetScan and miRDB.

| NO. | TargetScan          | miRDB               |
|-----|---------------------|---------------------|
| 1   | <b>miR-18a-3p</b>   | miR-466d            |
| 2   | miR-1912-3p         | <b>miR-338-3p</b>   |
| 3   | <b>miR-194-3p</b>   | miR-153-5p          |
| 4   | miR-667-3p          | <b>miR-6323</b>     |
| 5   | miR-218a-5p         | miR-195-3p          |
| 6   | miR-3594-5p         | miR-653-5p          |
| 7   | miR-448-5p          | <b>miR-18a-3p</b>   |
| 8   | miR-3084c-3p        | miR-298-3p          |
| 9   | miR-192-3p          | <b>miR-103-2-5p</b> |
| 10  | miR-3075            | <b>miR-194-3p</b>   |
| 11  | miR-1188-3p         | miR-149-5p          |
| 12  | miR-344a-5p         | <b>miR-181c-5p</b>  |
| 13  | miR-301a-5p         | <b>miR-181a-5p</b>  |
| 14  | miR-3590-5p         | <b>miR-181d-5p</b>  |
| 15  | <b>miR-338-3p</b>   | miR-466b-5p         |
| 16  | miR-301b-5p         | <b>miR-181b-5p</b>  |
| 17  | <b>miR-103-2-5p</b> | miR-466c-5p         |
| 18  | miR-711             | <b>miR-490-3p</b>   |
| 19  | miR-6334            |                     |
| 20  | miR-758-3p          |                     |
| 21  | miR-425-5p          |                     |
| 22  | miR-107-5p          |                     |
| 23  | miR-484             |                     |
| 24  | miR-99a-3p          |                     |
| 25  | miR-200b-5p         |                     |
| 26  | miR-210-5p          |                     |
| 27  | miR-489-3p          |                     |
| 28  | miR-541-3p          |                     |
| 29  | miR-16-5p           |                     |
| 30  | miR-195-5p          |                     |

|    |                    |
|----|--------------------|
| 31 | miR-10b-3p         |
| 32 | miR-292-3p         |
| 33 | <b>miR-6323</b>    |
| 34 | miR-200a-5p        |
| 35 | miR-103-1-5p       |
| 36 | miR-3571           |
| 37 | let-7c-1-3p        |
| 38 | miR-3561-5p        |
| 39 | miR-99b-3p         |
| 40 | miR-878            |
| 41 | miR-196c-3p        |
| 42 | miR-485-5p         |
| 43 | miR-217-3p         |
| 44 | miR-3561-3p        |
| 45 | miR-15a-5p         |
| 46 | miR-204-3p         |
| 47 | miR-15b-5p         |
| 48 | miR-497-5p         |
| 49 | miR-3085           |
| 50 | miR-208b-5p        |
| 51 | miR-1199-5p        |
| 52 | miR-540-5p         |
| 53 | miR-3586-5p        |
| 54 | miR-339-5p         |
| 55 | miR-322-5p         |
| 56 | miR-3570           |
| 57 | <b>miR-181b-5p</b> |
| 58 | <b>miR-181d-5p</b> |
| 59 | <b>miR-181a-5p</b> |
| 60 | <b>miR-181c-5p</b> |
| 61 | miR-3560           |
| 62 | <b>miR-490-3p</b>  |

|    |             |
|----|-------------|
| 63 | miR-135b-5p |
| 64 | miR-1188-5p |
| 65 | miR-881-3p  |
| 66 | miR-770-5p  |
| 67 | miR-134-3p  |
| 68 | miR-296-3p  |
| 69 | miR-208a-5p |

---

Note: The microRNAs predicted to target *Zip14* are shown using four prediction tools including TargetScan (Context++ Score  $\geq 85$ ) and miRDB(Target Score  $\geq 60$ ). In bold are overlapping microRNAs of the prediction results.

Table S5. miRNA and the corresponding primer sequences.

| Names               | Sequence (5' to 3')                                      | Accession No. |
|---------------------|----------------------------------------------------------|---------------|
| miR-103-2-5p        | agcttctttacagtget                                        | MIMAT0017113  |
| miR-194-3p          | ccagtggggctgctgttatct                                    | MIMAT0017148  |
| miR-338-3p          | tccagcatcagtgatttgttga                                   | MIMAT0000581  |
| miR-490-3p          | caacctggaggactccatgctg                                   | MIMAT0012823  |
| miR-6323            | tggaaactccatctctggctgtgca                                | MIMAT0025062  |
| miR-18a-3p          | actgccctaagtgtccttct                                     | MIMAT0017095  |
| miR-181a-5p         | aacattcaacgctgtcggtgagt                                  | MIMAT0000858  |
| miR-181b-5p         | aacattcattgctgtcggtgggt                                  | MIMAT0000859  |
| miR-181c-5p         | aacattcaacctgtcggtgagt                                   | MIMAT0000857  |
| miR-181d-5p         | aacattcattgtgtcggtgggt                                   | MIMAT0005299  |
| Universal primer    | tagagtgagtgtagcgagca                                     | N/A           |
| Poly(T) adapter     | tagagtgagtgtagcgagcacagaattaatacgactcactatag<br>g(t)16vn | N/A           |
| Exogenous reference | gtgaccacgatgtgtattcgc                                    | N/A           |

Table S6. miRNA mimics sequences.

| <b>Names</b>       | <b>Sequence (5'to 3')</b> | <b>Source</b>   | <b>Catalogue no.</b> |
|--------------------|---------------------------|-----------------|----------------------|
| miR-181a-5p mimics | aacauucaacgcugucggugagu   | Biomics Biotech | BG091801             |
| miR-181b-5p mimics | aacauucauuguugucggugggu   | Biomics Biotech | BG0708               |
| miR-181c-5p mimics | aacauucaaccugucggugagu    | Biomics Biotech | BG091801             |
| miR-181d-5p mimics | aacauucauuguugucggugggu   | Biomics Biotech | BG0708               |



Table S7. The effect of chronic variable stress on average daily gain, average daily feed intake and average iron intake of rats.

| Parameters                      | Control      | CVS          | P-Value |
|---------------------------------|--------------|--------------|---------|
| Average daily gain (g/d)        | 5.99 ± 0.09  | 3.76 ± 0.23  | 0.00    |
| Average daily feed intake (g/d) | 24.74 ± 0.37 | 23.50 ± 0.38 | 0.04    |
| Average daily Fe intake (mg/d)  | 7.49 ± 0.11  | 7.12 ± 0.11  | 0.04    |

Note: CVS, Chronic variable stress group. Values were expressed as means ± SEM, n = 12 in each group.

Table S8. Effect of chronic variable stress on plasma iron metabolism-related parameters in rats.

| Parameters           | Control      | CVS          | <i>P</i> -Value |
|----------------------|--------------|--------------|-----------------|
| Plasma iron (μmol/L) | 23.02 ± 1.39 | 32.47 ± 1.43 | 0.00            |
| TIBC (μmol/L)        | 72.36 ± 1.43 | 79.61 ± 1.60 | 0.00            |
| UIBC (μmol/L)        | 49.34 ± 1.78 | 47.14 ± 1.60 | 0.37            |
| Ts (%)               | 31.86 ± 1.91 | 40.78 ± 1.59 | 0.00            |

Note: CVS, Chronic variable stress group; TIBC, total iron binding capacity; UIBC, unsaturated iron binding capacity; TS, transferrin saturation. Values were expressed as means ± SEM, n = 12 in each group.
